# Supplementary material for: Incidence and prevalence of type 2 diabetes by occupation: results from all Swedish employees
Source: Springer Nature journal article supplement (doi:10.1007/s00125-019-04997-5), 2019-09-17

**ESM Table 1. Incidence (per 1000 person-years) 2006-2015 and prevalence (per 100) in 2013 of type 2 diabetes among the 30 most common occupations in Swedish men.**

| Occupation                                                   | No. Cases | Person-years | Age-standardized Incidence (95% CI) | SIR (95% CI)     | No. Cases | Prevalence (95% CI) | Age-standardized Prevalence (95% CI) | PAR %  |
|--------------------------------------------------------------|-----------|--------------|-------------------------------------|------------------|-----------|---------------------|--------------------------------------|--------|
| Manufacturing labourers <sup>1</sup>                         | 3 263     | 359 768      | 9.41 (9.09-9.74)                    | 1.49 (1.44-1.55) | 1 160     | 7.75 (7.32-8.17)    | 7.77 (7.35-8.19)                     | 1.75%  |
| Motor-vehicle drivers <sup>1</sup>                           | 10 762    | 1 134 058    | 9.32 (9.15-9.50)                    | 1.47 (1.44-1.50) | 8 143     | 8.77 (8.59-8.96)    | 8.00 (7.84-8.17)                     | 5.42%  |
| Agricultural and other mobile plant operators <sup>1</sup>   | 3 376     | 408 776      | 8.31 (8.03-8.59)                    | 1.31 (1.26-1.35) | 2 170     | 7.21 (6.92-7.50)    | 6.97 (6.69-7.24)                     | 1.62%  |
| Personal carers <sup>1b</sup>                                | 4 852     | 696 143      | 8.17 (7.93-8.41)                    | 1.34 (1.30-1.38) | 4 066     | 7.12 (6.91-7.33)    | 7.46 (7.24-7.68)                     | 2.68%  |
| Stores and transport clerks                                  | 4 993     | 714 456      | 7.87 (7.65-8.09)                    | 1.25 (1.21-1.28) | 2 260     | 6.12 (5.87-6.36)    | 6.43 (6.17-6.68)                     | 2.58%  |
| Machine operators <sup>1</sup>                               | 1 854     | 295 306      | 7.63 (7.25-8.00)                    | 1.22 (1.17-1.28) | 1 001     | 5.75 (5.40-6.09)    | 6.23 (5.86-6.60)                     | 1.00%  |
| Metal- and mineral-products machine operators <sup>1</sup>   | 4 020     | 587 463      | 7.57 (7.33-7.81)                    | 1.20 (1.16-1.23) | 1 845     | 6.09 (5.82-6.36)    | 6.16 (5.89-6.43)                     | 1.97%  |
| Office clerks                                                | 2 314     | 340 379      | 7.03 (6.74-7.32)                    | 1.10 (1.06-1.15) | 1 276     | 7.14 (6.76-7.51)    | 6.70 (6.35-7.05)                     | 0.99%  |
| Retail salespersons <sup>1</sup>                             | 3 826     | 709 113      | 7.01 (6.78-7.24)                    | 1.10 (1.06-1.13) | 2 431     | 5.35 (5.14-5.56)    | 6.03 (5.80-6.26)                     | 2.06%  |
| Metal moulders, welders and sheet-metal workers <sup>1</sup> | 2 993     | 463 715      | 6.93 (6.68-7.17)                    | 1.09 (1.05-1.13) | 1 386     | 5.29 (5.02-5.56)    | 5.37 (5.10-5.64)                     | 1.32%  |
| Assemblers <sup>1</sup>                                      | 3 074     | 551 473      | 6.89 (6.64-7.15)                    | 1.10 (1.06-1.13) | 1 505     | 5.33 (5.07-5.59)    | 5.85 (5.56-6.13)                     | 1.55%  |
| Building finishers and related trades workers <sup>1</sup>   | 7 692     | 1 117 810    | 6.72 (6.57-6.87)                    | 1.06 (1.03-1.08) | 4 791     | 5.72 (5.56-5.88)    | 5.27 (5.13-5.41)                     | 2.99%  |
| Machinery mechanics and fitters <sup>1</sup>                 | 4 315     | 684 991      | 6.51 (6.32-6.71)                    | 1.02 (0.99-1.05) | 2 371     | 5.36 (5.15-5.57)    | 5.26 (5.06-5.46)                     | 1.71%  |
| Total working population                                     | 123 114   | 19 345 377   | 6.36 (6.33-6.40)                    | 1.00 (0.99-1.01) | 93 997    | 5.19 (5.15-5.22)    | 5.19 (5.15-5.22)                     | 46.04% |
| Electrical and electronic equipment mechanics <sup>1</sup>   | 2 715     | 455 802      | 6.28 (6.04-6.52)                    | 0.98 (0.95-1.02) | 1 257     | 5.48 (5.18-5.77)    | 5.02 (4.75-5.29)                     | 1.05%  |
| Managers of small enterprises                                | 5 986     | 930 234      | 5.97 (5.81-6.12)                    | 0.94 (0.92-0.96) | 2 949     | 5.29 (5.11-5.48)    | 4.85 (4.68-5.01)                     | 1.91%  |
| Construction workers <sup>1</sup>                            | 6 305     | 1 102 673    | 5.84 (5.70-5.99)                    | 0.92 (0.89-0.94) | 3 663     | 4.13 (4.00-4.26)    | 4.14 (4.01-4.27)                     | 2.16%  |
| Computer technicians and data operators                      | 1 738     | 436 861      | 5.75 (5.43-6.06)                    | 0.90 (0.86-0.94) | 945       | 3.64 (3.41-3.86)    | 4.82 (4.51-5.13)                     | 0.82%  |
| Accountants                                                  | 1 795     | 314 650      | 5.51 (5.25-5.76)                    | 0.87 (0.83-0.91) | 858       | 5.53 (5.17-5.89)    | 4.96 (4.63-5.28)                     | 0.53%  |
| Finance and sales associate professionals                    | 7 921     | 1 594 203    | 5.43 (5.31-5.55)                    | 0.84 (0.82-0.86) | 4 311     | 4.01 (3.89-4.12)    | 4.30 (4.18-4.43)                     | 2.59%  |

|                                                    |       |           |                  |                  |       |                  |                  |           |
|----------------------------------------------------|-------|-----------|------------------|------------------|-------|------------------|------------------|-----------|
| <b>Elementary school teachers</b>                  | 1 451 | 284 469   | 5.20 (4.93-5.47) | 0.81 (0.77-0.86) | 697   | 4.43 (4.11-4.75) | 4.33 (4.02-4.65) | 0.41%     |
| <b>Engineers and technicians</b>                   | 8 908 | 1 719 893 | 5.16 (5.05-5.26) | 0.81 (0.79-0.83) | 4 077 | 4.26 (4.13-4.38) | 4.25 (4.12-4.37) | 2.40%     |
| <b>Public service administrative professionals</b> | 2 151 | 355 391   | 5.08 (4.86-5.30) | 0.81 (0.78-0.85) | 972   | 4.80 (4.50-5.09) | 3.90 (3.66-4.15) | 0.47%     |
| <b>Directors and chief executives</b>              | 1 988 | 347 576   | 4.97 (4.75-5.19) | 0.78 (0.75-0.82) | 934   | 4.06 (3.80-4.31) | 3.88 (3.64-4.12) | 0.43%     |
| <b>Production and operations managers</b>          | 3 864 | 739 382   | 4.85 (4.69-5.00) | 0.77 (0.74-0.79) | 1 604 | 3.53 (3.36-3.70) | 3.59 (3.42-3.77) | 0.85%     |
| <b>Computer scientists</b>                         | 2 741 | 881 965   | 4.56 (4.36-4.75) | 0.68 (0.65-0.70) | 1 600 | 2.46 (2.34-2.58) | 3.61 (3.43-3.78) | 0.80%     |
| <b>Senior high school teachers</b>                 | 1 867 | 372 260   | 4.50 (4.30-4.71) | 0.71 (0.68-0.74) | 1 065 | 4.31 (4.05-4.56) | 3.77 (3.55-4.00) | 0.32%     |
| <b>Specialist managers</b>                         | 3 671 | 876 827   | 4.27 (4.12-4.41) | 0.66 (0.64-0.68) | 1 371 | 2.81 (2.66-2.96) | 3.16 (3.00-3.33) | 0.59%     |
| <b>Business professionals</b>                      | 3 199 | 781 043   | 4.16 (4.02-4.31) | 0.65 (0.63-0.67) | 1 555 | 3.42 (3.25-3.59) | 3.37 (3.21-3.54) | 0.47%     |
| <b>Architects and civil engineers</b>              | 2 786 | 837 665   | 3.83 (3.68-3.97) | 0.59 (0.56-0.61) | 1 500 | 2.80 (2.66-2.94) | 3.25 (3.09-3.41) | 0.27%     |
| <b>College and university teachers</b>             | 794   | 262 374   | 3.44 (3.20-3.68) | 0.54 (0.50-0.57) | 401   | 2.65 (2.40-2.91) | 2.69 (2.43-2.95) | Reference |

<sup>1</sup> Occupations classified as being in the lowest socio-economic status group. i.e. “skilled and unskilled manual workers” according to Statistics Sweden. <sup>b</sup>Personal carers includes child-care workers, assistant nurses, hospital ward assistants, home-based personal care, attendants in psychiatric care and dental nurses.

**ESM Table 2. Incidence (per 1000 person-years) 2006-2015 and prevalence (per 100) in 2013 of type 2 diabetes among the 30 most common occupations in Swedish women.**

| Occupation                                         | No. Cases | Person-years | Age-standardized Incidence (95% CI) | SIR (95% CI)     | No. Cases | Prevalence (95% CI) | Age-standardized prevalence (95% CI) | PAR %  |
|----------------------------------------------------|-----------|--------------|-------------------------------------|------------------|-----------|---------------------|--------------------------------------|--------|
| Manufacturing labourers <sup>1</sup>               | 1 743     | 244 236      | 7.20 (6.86-7.54)                    | 1.80 (1.72-1.89) | 634       | 6.42 (5.94-6.91)    | 5.93 (5.49-6.38)                     | 1.55%  |
| Cleaners <sup>1</sup>                              | 5 562     | 885 336      | 6.18 (6.02-6.34)                    | 1.53 (1.49-1.57) | 3 286     | 5.09 (4.92-5.26)    | 4.90 (4.73-5.06)                     | 4.48%  |
| Kitchen assistants <sup>1</sup>                    | 3 687     | 659 950      | 5.65 (5.47-5.84)                    | 1.39 (1.35-1.44) | 1 869     | 5.45 (5.21-5.69)    | 5.10 (4.88-5.33)                     | 2.90%  |
| Cooks, waitresses and housekeepers <sup>1</sup>    | 2 247     | 471 604      | 5.01 (4.80-5.22)                    | 1.24 (1.19-1.29) | 1 102     | 4.06 (3.82-4.29)    | 4.13 (3.90-4.37)                     | 1.68%  |
| Personal carers <sup>1b</sup>                      | 23 898    | 4 954 782    | 5.00 (4.93-5.06)                    | 1.25 (1.23-1.26) | 16 743    | 4.31 (4.25-4.38)    | 4.18 (4.12-4.24)                     | 17.65% |
| Cashiers, tellers and related clerks <sup>1</sup>  | 1 162     | 266 063      | 4.45 (4.19-4.71)                    | 1.09 (1.03-1.15) | 381       | 4.17 (3.76-4.58)    | 4.12 (3.71-4.54)                     | 0.77%  |
| Social work associate professionals <sup>1</sup>   | 1 175     | 319 264      | 4.23 (3.98-4.48)                    | 1.05 (0.99-1.11) | 585       | 3.12 (2.87-3.37)    | 3.43 (3.16-3.71)                     | 0.83%  |
| Office clerks                                      | 5 910     | 1 357 026    | 4.08 (3.98-4.19)                    | 1.02 (0.99-1.04) | 2 540     | 3.83 (3.68-3.98)    | 3.38 (3.25-3.51)                     | 3.26%  |
| Client information clerks                          | 1 873     | 527 156      | 4.06 (3.88-4.25)                    | 1.00 (0.96-1.05) | 857       | 3.24 (3.03-3.46)    | 3.32 (3.11-3.54)                     | 1.25%  |
| Total working population                           | 78 603    | 19 493 239   | 4.03 (4.00-4.06)                    | 1.00 (0.99-1.01) | 56 134    | 3.17 (3.14-3.20)    | 3.17 (3.14-3.20)                     | 45.38% |
| Retail salespersons <sup>1</sup>                   | 4 390     | 1 263 785    | 3.95 (3.83-4.07)                    | 0.97 (0.94-1.00) | 2 179     | 2.86 (2.74-2.98)    | 3.02 (2.89-3.14)                     | 2.81%  |
| Numerical clerks                                   | 3 466     | 904 243      | 3.66 (3.54-3.79)                    | 0.91 (0.88-0.95) | 1 571     | 3.35 (3.19-3.51)    | 2.91 (2.76-3.05)                     | 1.68%  |
| Office secretaries and data entry operators        | 2 571     | 685 184      | 3.46 (3.32-3.59)                    | 0.85 (0.82-0.89) | 1 119     | 3.55 (3.34-3.75)    | 3.05 (2.87-3.23)                     | 1.10%  |
| Health professionals (except nursing) <sup>c</sup> | 821       | 251 156      | 3.43 (3.19-3.67)                    | 0.90 (0.83-0.96) | 588       | 2.71 (2.50-2.93)    | 2.89 (2.66-3.12)                     | 0.39%  |
| Managers of small enterprises                      | 1 396     | 421 910      | 3.38 (3.20-3.56)                    | 0.83 (0.79-0.87) | 496       | 2.18 (1.99-2.37)    | 2.29 (2.09-2.49)                     | 0.64%  |
| Engineers and technicians                          | 844       | 344 944      | 3.10 (2.88-3.32)                    | 0.74 (0.69-0.79) | 345       | 1.90 (1.70-2.10)    | 2.26 (2.02-2.50)                     | 0.39%  |
| Accountants                                        | 3 198     | 1 041 511    | 3.09 (2.98-3.20)                    | 0.77 (0.74-0.79) | 1 578     | 2.63 (2.51-2.76)    | 2.51 (2.39-2.63)                     | 1.18%  |
| Nurses                                             | 2 150     | 745 347      | 3.08 (2.95-3.21)                    | 0.76 (0.73-0.79) | 1 318     | 2.44 (2.31-2.57)    | 2.41 (2.28-2.54)                     | 0.84%  |
| Public service administrative professionals        | 1 492     | 486 201      | 3.08 (2.92-3.24)                    | 0.76 (0.72-0.80) | 685       | 2.21 (2.04-2.37)    | 2.20 (2.04-2.36)                     | 0.54%  |
| Psychologists and social workers                   | 1 000     | 339 377      | 2.98 (2.79-3.17)                    | 0.74 (0.70-0.79) | 617       | 2.42 (2.24-2.61)    | 2.43 (2.24-2.61)                     | 0.34%  |
| Finance and sales associate professionals          | 2 385     | 1 003 739    | 2.91 (2.79-3.03)                    | 0.70 (0.67-0.73) | 1 080     | 1.73 (1.63-1.83)    | 2.01 (1.89-2.13)                     | 0.91%  |
| Preschool and recreation teachers                  | 2 128     | 860 863      | 2.89 (2.76-3.02)                    | 0.70 (0.67-0.73) | 1 494     | 2.12 (2.01-2.22)    | 2.23 (2.12-2.34)                     | 0.76%  |
| Computer scientists                                | 515       | 289 962      | 2.81 (2.48-3.13)                    | 0.63 (0.58-0.69) | 300       | 1.47 (1.31-1.64)    | 2.02 (1.77-2.27)                     | 0.23%  |
| Production and operations managers                 | 1 155     | 425 016      | 2.79 (2.62-2.96)                    | 0.69 (0.65-0.73) | 766       | 1.99 (1.85-2.13)    | 2.10 (1.95-2.25)                     | 0.32%  |
| Midwives and specialist nurses                     | 1 351     | 472 416      | 2.74 (2.59-2.89)                    | 0.68 (0.64-0.71) | 622       | 2.19 (2.02-2.36)    | 2.10 (1.94-2.27)                     | 0.33%  |

|                                                |       |         |                  |                  |       |                  |                  |           |
|------------------------------------------------|-------|---------|------------------|------------------|-------|------------------|------------------|-----------|
| <b>Business professionals</b>                  | 1 865 | 846 841 | 2.67 (2.54-2.79) | 0.63 (0.61-0.66) | 887   | 1.67 (1.56-1.78) | 1.97 (1.84-2.10) | 0.51%     |
| <b>Elementary school teachers</b>              | 2 162 | 859 285 | 2.62 (2.51-2.73) | 0.65 (0.62-0.68) | 1 144 | 1.98 (1.86-2.09) | 2.08 (1.96-2.20) | 0.46%     |
| <b>Senior high school teachers</b>             | 1 134 | 437 258 | 2.49 (2.35-2.64) | 0.62 (0.58-0.65) | 565   | 1.98 (1.82-2.14) | 1.92 (1.76-2.08) | 0.16%     |
| <b>Specialist managers</b>                     | 632   | 356 058 | 2.30 (2.10-2.50) | 0.52 (0.48-0.56) | 265   | 1.17 (1.03-1.31) | 1.62 (1.41-1.82) | 0.05%     |
| <b>Writers, creative or performing artists</b> | 488   | 288 759 | 2.27 (2.06-2.48) | 0.53 (0.48-0.58) | 264   | 1.29 (1.14-1.44) | 1.67 (1.46-1.88) | 0.03%     |
| <b>Physiotherapists and dental hygienists</b>  | 728   | 351 091 | 2.20 (2.04-2.36) | 0.55 (0.51-0.59) | 434   | 1.60 (1.45-1.75) | 1.63 (1.48-1.78) | Reference |

<sup>1</sup> Occupations classified as being in the lowest socio-economic status group. i.e. “skilled and unskilled manual workers” according to Statistics Sweden. <sup>b</sup>Personal carers includes child-care workers, assistant nurses, hospital ward assistants, home-based personal care, attendants in psychiatric care and dental nurses. <sup>c</sup> Health professionals includes physicians, veterinarians, dentists, pharmacists and speech therapists.

**ESM Table 3. Prevalence (per 100) of type 2 diabetes in men age  $\geq 55$  years among the 30 most common occupations in Swedish men in 2013.**

| Occupation                                                   | No. Cases     | No. population | Prevalence   | 95% CI             |
|--------------------------------------------------------------|---------------|----------------|--------------|--------------------|
| Manufacturing labourers <sup>1</sup>                         | 780           | 5 242          | 14.88        | 13.92-15.84        |
| Motor-vehicle drivers <sup>1</sup>                           | 5 330         | 37 459         | 14.23        | 13.88-14.58        |
| Office clerks                                                | 927           | 7 078          | 13.10        | 12.31-13.88        |
| Agricultural and other mobile plant operators <sup>1</sup>   | 1 453         | 11 098         | 13.09        | 12.46-13.72        |
| Personal carers <sup>1b</sup>                                | 2 350         | 18 391         | 12.78        | 12.30-13.26        |
| Stores and transport clerks                                  | 1 473         | 12 035         | 12.24        | 11.65-12.82        |
| Metal- and mineral-products machine operators <sup>1</sup>   | 1 168         | 10 114         | 11.55        | 10.93-12.17        |
| Retail salespersons <sup>1</sup>                             | 1 504         | 13 408         | 11.22        | 10.68-11.75        |
| Machine operators <sup>1</sup>                               | 580           | 5 251          | 11.05        | 10.20-11.89        |
| Assemblers <sup>1</sup>                                      | 909           | 8 398          | 10.82        | 10.16-11.49        |
| Metal moulders, welders and sheet-metal workers <sup>1</sup> | 931           | 8 783          | 10.60        | 9.96-11.24         |
| Machinery mechanics and fitters <sup>1</sup>                 | 1 619         | 15 849         | 10.22        | 9.74-10.69         |
| Electrical and electronic equipment mechanics <sup>1</sup>   | 927           | 9 117          | 10.17        | 9.55-10.79         |
| Building finishers and related trades workers <sup>1</sup>   | 3 371         | 33 217         | 10.15        | 9.82-10.47         |
| Managers of small enterprises                                | 651           | 6 420          | 10.14        | 9.40-10.88         |
| Accountants                                                  | 2 182         | 21 665         | 10.07        | 9.67-10.47         |
| <b>Total working population</b>                              | <b>63 997</b> | <b>635 246</b> | <b>10.07</b> | <b>10.00-10.15</b> |
| Computer technicians and data operators                      | 542           | 5 803          | 9.34         | 8.59-10.09         |
| Finance and sales associate professionals                    | 3 113         | 34 095         | 9.13         | 8.82-9.44          |
| Engineers and technicians                                    | 2 957         | 33 322         | 8.87         | 8.57-9.18          |
| Public service administrative professionals                  | 793           | 9 239          | 8.58         | 8.01-9.15          |
| Elementary school teachers                                   | 511           | 6 072          | 8.42         | 7.72-9.11          |
| Directors and chief executives                               | 697           | 8 397          | 8.30         | 7.71-8.89          |
| Construction workers <sup>1</sup>                            | 2 488         | 30 347         | 8.20         | 7.89-8.51          |
| Production and operations managers                           | 1 159         | 15 544         | 7.46         | 7.04-7.87          |
| Computer scientists                                          | 990           | 13 301         | 7.44         | 7.00-7.89          |
| Senior high school teachers                                  | 795           | 10 850         | 7.33         | 6.84-7.82          |
| Business professionals                                       | 1 181         | 16 346         | 7.23         | 6.83-7.62          |
| Architects and civil engineers                               | 1 057         | 15 346         | 6.89         | 6.49-7.29          |
| Specialist managers                                          | 967           | 14 280         | 6.77         | 6.36-7.18          |
| College and university teachers                              | 287           | 5 309          | 5.41         | 4.80-6.01          |

<sup>1</sup> Occupations classified as being in the lowest socio-economic status group, i.e. "skilled and unskilled manual workers" according to Statistics Sweden. <sup>b</sup>Personal carers includes child-care workers, assistant nurses, hospital ward assistants, home-based personal care, attendants in psychiatric care and dental nurses.

**ESM Table 4. Prevalence (per 100) of type 2 diabetes in women age  $\geq 55$  years among the 30 most common occupations in Swedish women in 2013.**

| Occupation                                         | No. Cases     | No. population | Prevalence  | 95% CI           |
|----------------------------------------------------|---------------|----------------|-------------|------------------|
| Manufacturing labourers <sup>1</sup>               | 430           | 4 037          | 10.65       | 9.70-11.60       |
| Kitchen assistants <sup>1</sup>                    | 1 197         | 13 832         | 8.65        | 8.19-9.12        |
| Cleaners <sup>1</sup>                              | 2 041         | 24 577         | 8.30        | 7.96-8.65        |
| Cashiers, tellers and related clerks <sup>1</sup>  | 270           | 3 346          | 8.07        | 7.15-8.99        |
| Cooks, waitresses and housekeepers <sup>1</sup>    | 742           | 9 345          | 7.94        | 7.39-8.49        |
| Personal carers <sup>1b</sup>                      | 10 246        | 148 687        | 6.89        | 6.76-7.02        |
| Office clerks                                      | 1 868         | 28 620         | 6.53        | 6.24-6.81        |
| Social work associate professionals <sup>1</sup>   | 360           | 5 698          | 6.32        | 5.69-6.95        |
| Client information clerks                          | 536           | 9 111          | 5.88        | 5.40-6.37        |
| <b>Total working population</b>                    | <b>36 076</b> | <b>634 616</b> | <b>5.68</b> | <b>5.63-5.74</b> |
| Retail salespersons <sup>1</sup>                   | 1 382         | 24 515         | 5.64        | 5.35-5.93        |
| Numerical clerks                                   | 1 135         | 20 737         | 5.47        | 5.16-5.78        |
| Office secretaries and data entry operators        | 789           | 14 625         | 5.39        | 5.03-5.76        |
| Accountants                                        | 1 088         | 23 224         | 4.68        | 4.41-4.96        |
| Engineers and technicians                          | 226           | 4 836          | 4.67        | 4.08-5.27        |
| Managers of small enterprises                      | 329           | 7 372          | 4.46        | 3.99-4.93        |
| Psychologists and social workers                   | 410           | 9 409          | 4.36        | 3.95-4.77        |
| Nurses                                             | 858           | 20 533         | 4.18        | 3.90-4.45        |
| Health professionals (except nursing) <sup>c</sup> | 288           | 7 155          | 4.03        | 3.57-4.48        |
| Public service administrative professionals        | 456           | 11 362         | 4.01        | 3.65-4.37        |
| Finance and sales associate professionals          | 689           | 17 208         | 4.00        | 3.71-4.30        |
| Business professionals                             | 575           | 14 532         | 3.96        | 3.64-4.27        |
| Elementary school teachers                         | 762           | 19 796         | 3.85        | 3.58-4.12        |
| Computer scientists                                | 146           | 3 874          | 3.77        | 3.17-4.37        |
| Preschool and recreation teachers                  | 898           | 24 174         | 3.71        | 3.48-3.95        |
| Production and operations managers                 | 481           | 13 146         | 3.66        | 3.34-3.98        |
| Senior high school teachers                        | 379           | 10 757         | 3.52        | 3.17-3.87        |
| Midwives and specialist nurses                     | 401           | 11 659         | 3.44        | 3.11-3.77        |
| Writers, creative or performing artists            | 153           | 4 652          | 3.29        | 2.78-3.80        |
| Specialist managers                                | 149           | 4 745          | 3.14        | 2.64-3.64        |
| Physiotherapists and dental hygienists             | 262           | 9 528          | 2.75        | 2.42-3.08        |

<sup>1</sup> Occupations classified as being in the lowest socio-economic status group, i.e. "skilled and unskilled manual workers" according to Statistics Sweden. <sup>b</sup> Personal carers includes child-care workers, assistant nurses, hospital ward assistants, home-based personal care, attendants in psychiatric care and dental nurses.

**ESM Table 5. Age and sex-standardized incidence (per 1000 person-years) 2006-2015 and prevalence (per 100) 2013 of type 2 diabetes in men and women combined across all occupations in Sweden.**

| Occupation                                                        | No. incident cases | Person-years | Incidence (95% CI) | SIR (95% CI)     | No. prevalent cases | Prevalence (95% CI) |
|-------------------------------------------------------------------|--------------------|--------------|--------------------|------------------|---------------------|---------------------|
| Sales and services elementary occupations                         | 3 688              | 377 108      | 9.33 (9.01-9.65)   | 1.78 (1.72-1.84) | 3 559               | 10.93 (10.59-11.27) |
| Mining and construction labourers                                 | 255                | 40 503       | 8.55 (4.37-12.72)  | 1.22 (1.08-1.38) | 154                 | 4.75 (4.02-5.48)    |
| Street vendors and market salespersons                            | 47                 | 4 951        | 8.33 (5.79-10.87)  | 1.63 (1.20-2.16) | 75                  | 9.45 (7.41-11.48)   |
| Manufacturing labourers                                           | 5 006              | 604 004      | 8.30 (8.07-8.54)   | 1.59 (1.55-1.63) | 1 794               | 7.22 (6.90-7.54)    |
| Mineral-processing-plant operators                                | 149                | 21 309       | 8.28 (5.27-11.29)  | 1.24 (1.05-1.45) | 87                  | 6.33 (5.04-7.62)    |
| Industrial-robot operators                                        | 82                 | 13 791       | 8.10 (5.63-10.56)  | 1.33 (1.06-1.66) | 37                  | 4.60 (3.15-6.04)    |
| Cleaners                                                          | 7 477              | 1 113 879    | 8.00 (7.75-8.24)   | 1.56 (1.53-1.60) | 4 613               | 5.63 (5.47-5.79)    |
| Kitchen assistants                                                | 4 905              | 836 537      | 7.71 (7.38-8.04)   | 1.46 (1.42-1.50) | 2 573               | 5.73 (5.51-5.94)    |
| Motor-vehicle drivers                                             | 11 281             | 1 229 449    | 7.59 (7.32-7.86)   | 1.47 (1.44-1.50) | 8 504               | 8.49 (8.31-8.66)    |
| Food and related products machine operators                       | 1 871              | 309 780      | 7.06 (6.72-7.40)   | 1.37 (1.31-1.44) | 813                 | 5.52 (5.15-5.89)    |
| Food processing and related trades workers                        | 948                | 145 129      | 7.00 (6.46-7.53)   | 1.45 (1.36-1.54) | 548                 | 6.12 (5.62-6.62)    |
| Housekeeping and restaurant services workers                      | 3 724              | 713 956      | 6.99 (6.71-7.26)   | 1.30 (1.26-1.34) | 2 185               | 4.80 (4.60-4.99)    |
| Metal-processing-plant operators                                  | 1 615              | 198 797      | 6.99 (6.50-7.48)   | 1.36 (1.29-1.43) | 908                 | 7.10 (6.66-7.55)    |
| Garbage collectors and related labourers                          | 1 115              | 135 370      | 6.98 (6.25-7.72)   | 1.36 (1.28-1.44) | 626                 | 7.29 (6.74-7.84)    |
| Wood-processing- and papermaking-plant operators                  | 1 934              | 250 583      | 6.94 (6.48-7.41)   | 1.30 (1.24-1.36) | 1 077               | 6.91 (6.51-7.31)    |
| Chemical-processing-plant operators                               | 548                | 92 692       | 6.87 (6.05-7.69)   | 1.20 (1.11-1.31) | 279                 | 5.34 (4.73-5.95)    |
| Rubber- and plastic-products machine operators                    | 1 182              | 193 926      | 6.65 (6.24-7.06)   | 1.28 (1.21-1.35) | 583                 | 5.69 (5.24-6.14)    |
| Glass, ceramics and related plant operators                       | 144                | 21 900       | 6.59 (5.32-7.86)   | 1.28 (1.08-1.51) | 62                  | 5.15 (3.90-6.39)    |
| Personal carers                                                   | 28 750             | 5 650 925    | 6.58 (6.46-6.70)   | 1.26 (1.25-1.27) | 20 809              | 4.67 (4.61-4.74)    |
| Metal- and mineral-products machine operators                     | 4 473              | 675 666      | 6.55 (6.27-6.84)   | 1.21 (1.18-1.25) | 2 019               | 5.87 (5.62-6.12)    |
| Transport labourers and freight handlers                          | 1 085              | 167 706      | 6.53 (5.89-7.16)   | 1.22 (1.15-1.29) | 658                 | 6.15 (5.70-6.61)    |
| Doorkeepers, newspaper and package deliverers and related workers | 2 254              | 297 234      | 6.51 (6.21-6.82)   | 1.23 (1.18-1.28) | 1 192               | 7.20 (6.80-7.59)    |
| Other machine operators and assemblers                            | 2 466              | 426 856      | 6.42 (6.13-6.70)   | 1.24 (1.19-1.29) | 1 282               | 5.29 (5.01-5.57)    |
| Textile-, fur- and leather-products machine operators             | 796                | 125 487      | 6.41 (5.93-6.89)   | 1.24 (1.15-1.33) | 389                 | 6.12 (5.53-6.71)    |
| Chemical-products machine operators                               | 994                | 182 175      | 6.30 (5.87-6.73)   | 1.21 (1.13-1.29) | 512                 | 4.91 (4.49-5.32)    |
| Cashiers, tellers and related clerks                              | 1 490              | 322 410      | 6.23 (5.76-6.70)   | 1.12 (1.06-1.18) | 511                 | 4.49 (4.11-4.88)    |
| Miners, shot firers, stonemasons and carvers                      | 281                | 39 646       | 6.22 (4.22-8.22)   | 1.15 (1.02-1.29) | 175                 | 5.49 (4.70-6.28)    |

|                                                                         |         |            |                  |                  |         |                   |
|-------------------------------------------------------------------------|---------|------------|------------------|------------------|---------|-------------------|
| <b>Printing-, binding- and paper-products machine operators</b>         | 1 186   | 180 223    | 6.21 (5.79-6.62) | 1.18 (1.11-1.25) | 625     | 5.97 (5.52-6.42)  |
| <b>Stores and transport clerks</b>                                      | 5 857   | 946 214    | 6.19 (6.00-6.38) | 1.22 (1.19-1.25) | 2 631   | 5.49 (5.29-5.70)  |
| <b>Construction workers</b>                                             | 6 408   | 1 123 041  | 6.14 (5.44-6.84) | 0.92 (0.90-0.95) | 3 787   | 4.15 (4.02-4.28)  |
| <b>Blacksmiths, tool-makers and related trades workers</b>              | 1 932   | 284 014    | 6.10 (5.65-6.55) | 1.11 (1.06-1.16) | 571     | 5.87 (5.40-6.34)  |
| <b>Agricultural and other mobile-plant operators</b>                    | 3 435   | 425 815    | 6.06 (5.54-6.58) | 1.30 (1.26-1.34) | 2 209   | 7.03 (6.74-7.31)  |
| <b>Client information clerks</b>                                        | 2 515   | 631 274    | 5.99 (5.65-6.32) | 1.06 (1.02-1.11) | 1 281   | 3.93 (3.72-4.15)  |
| <b>Wood-products machine operators</b>                                  | 1 571   | 263 751    | 5.96 (5.57-6.36) | 1.07 (1.02-1.12) | 499     | 5.29 (4.84-5.75)  |
| <b>Fishery workers, hunters and trappers</b>                            | 140     | 16 723     | 5.95 (2.84-9.07) | 1.13 (0.95-1.34) | 85      | 5.87 (4.66-7.08)  |
| <b>Social work associate professionals</b>                              | 2 252   | 489 615    | 5.95 (5.68-6.23) | 1.13 (1.08-1.18) | 1 175   | 4.18 (3.94-4.41)  |
| <b>Assemblers</b>                                                       | 3 977   | 762 677    | 5.90 (5.69-6.11) | 1.12 (1.09-1.16) | 1 951   | 5.01 (4.79-5.23)  |
| <b>Religious professionals</b>                                          | 296     | 42 278     | 5.82 (5.09-6.56) | 1.12 (0.99-1.25) | 210     | 5.83 (5.07-6.60)  |
| <b>Travel attendants and related workers</b>                            | 366     | 86 886     | 5.76 (5.13-6.39) | 1.05 (0.95-1.17) | 214     | 3.85 (3.35-4.36)  |
| <b>Protective services workers</b>                                      | 1 712   | 348 425    | 5.73 (5.40-6.07) | 1.08 (1.03-1.13) | 977     | 4.40 (4.13-4.67)  |
| <b>Building finishers and related trades workers</b>                    | 8 071   | 1 197 792  | 5.68 (5.44-5.93) | 1.06 (1.04-1.08) | 4 984   | 5.61 (5.46-5.76)  |
| <b>Metal moulders, welders and sheet-metal workers</b>                  | 3 041   | 476 331    | 5.64 (4.99-6.29) | 1.09 (1.05-1.13) | 1 412   | 5.25 (4.99-5.52)  |
| <b>Machinery mechanics and fitters</b>                                  | 4 372   | 700 580    | 5.60 (4.95-6.24) | 1.02 (0.99-1.06) | 2 392   | 5.31 (5.11-5.52)  |
| <b>Other personal services workers</b>                                  | 766     | 188 773    | 5.58 (5.12-6.04) | 0.91 (0.85-0.98) | 598     | 2.71 (2.50-2.92)  |
| <b>Electrical and electronic equipment mechanics and fitters</b>        | 2 955   | 510 981    | 5.57 (5.24-5.91) | 1.00 (0.96-1.04) | 1 317   | 5.41 (5.13-5.69)  |
| <b>Other office clerks</b>                                              | 8 224   | 1 697 405  | 5.55 (5.40-5.70) | 1.04 (1.02-1.06) | 3 816   | 4.53 (4.39-4.67)  |
| <b>Mail carriers and sorting clerks</b>                                 | 1 529   | 272 771    | 5.54 (5.25-5.82) | 1.05 (0.99-1.10) | 808     | 5.19 (4.84-5.53)  |
| <b>Library and filing clerks</b>                                        | 529     | 100 008    | 5.51 (4.94-6.09) | 0.99 (0.90-1.07) | 248     | 5.51 (4.85-6.18)  |
| <b>Agricultural, fishery and related labourers</b>                      | 259     | 46 526     | 5.50 (4.79-6.21) | 1.08 (0.96-1.22) | 158     | 5.97 (5.07-6.87)  |
| <b>Retail salespersons</b>                                              | 8 216   | 1 972 898  | 5.47 (5.34-5.60) | 1.03 (1.01-1.05) | 4 610   | 3.79 (3.68-3.90)  |
| <b>Forestry and related workers</b>                                     | 687     | 88 341     | 5.30 (4.61-5.99) | 0.99 (0.91-1.06) | 628     | 6.92 (6.40-7.44)  |
| <b>Garment and related trades workers</b>                               | 321     | 61 694     | 5.24 (4.60-5.87) | 0.99 (0.89-1.11) | 173     | 4.22 (3.61-4.84)  |
| <b>Power-production and related plant operators</b>                     | 714     | 108 900    | 5.24 (4.30-6.18) | 0.98 (0.91-1.06) | 611     | 5.78 (5.33-6.22)  |
| <b>Painters, building structure cleaners and related trades workers</b> | 1 653   | 275 391    | 5.20 (4.63-5.78) | 1.05 (1.00-1.10) | 971     | 4.62 (4.33-4.90)  |
| <b>Total working population</b>                                         | 201 717 | 38 838 616 | 5.19 (5.17-5.22) | 1.00 (1.00-1.00) | 150 131 | 4.19 (4.17-4.21)  |
| <b>Craft printing and related trades workers</b>                        | 636     | 110 848    | 5.18 (4.75-5.60) | 1.03 (0.95-1.12) | 227     | 5.41 (4.73-6.10)  |
| <b>Potters, glass-makers and related trades workers</b>                 | 152     | 32 470     | 5.12 (4.27-5.96) | 0.96 (0.82-1.13) | 75      | 5.32 (4.15-6.50)  |
| <b>Locomotive-engine drivers and related worker</b>                     | 440     | 63 019     | 5.08 (4.18-5.98) | 1.05 (0.96-1.16) | 266     | 5.33 (4.71-5.95)  |
| <b>Pelt, leather and shoemaking trades workers</b>                      | 72      | 10 243     | 5.07 (3.79-6.36) | 1.18 (0.92-1.48) | 77      | 9.39 (7.39-11.39) |
| <b>Ships' deck crews and related workers</b>                            | 178     | 23 634     | 5.03 (2.31-7.74) | 1.14 (0.98-1.32) | 113     | 6.59 (5.42-7.77)  |
| <b>Office secretaries and data entry operators</b>                      | 2 799   | 726 622    | 4.99 (4.56-5.42) | 0.87 (0.83-0.90) | 1 207   | 3.67 (3.46-3.87)  |



|                                                                           |        |           |                  |                  |       |                   |
|---------------------------------------------------------------------------|--------|-----------|------------------|------------------|-------|-------------------|
| <b>Market gardeners and crop growers</b>                                  | 2 168  | 326 780   | 4.94 (4.67-5.20) | 0.99 (0.95-1.03) | 1 404 | 5.36 (5.09-5.63)  |
| <b>Administrative professionals of special-interest organisations</b>     | 671    | 122 718   | 4.93 (4.54-5.31) | 0.96 (0.89-1.04) | 406   | 5.56 (5.03-6.09)  |
| <b>Numerical clerks</b>                                                   | 4 114  | 1 008 605 | 4.92 (4.67-5.16) | 0.92 (0.89-0.95) | 1 869 | 3.65 (3.48-3.81)  |
| <b>Business services agents and trade brokers</b>                         | 1 320  | 291 633   | 4.90 (4.63-5.17) | 0.94 (0.89-0.99) | 807   | 3.76 (3.50-4.01)  |
| <b>Religious associate professionals</b>                                  | 104    | 19 940    | 4.89 (3.85-5.93) | 0.87 (0.71-1.05) | 67    | 5.05 (3.87-6.23)  |
| <b>Crop and animal producers</b>                                          | 1 488  | 191 067   | 4.85 (4.48-5.22) | 0.95 (0.90-1.00) | 793   | 5.61 (5.23-5.99)  |
| <b>Nursing associate professionals</b>                                    | 2 521  | 818 442   | 4.77 (4.38-5.17) | 0.79 (0.76-0.82) | 1 596 | 2.68 (2.55-2.81)  |
| <b>Other teaching associate professionals</b>                             | 670    | 131 851   | 4.77 (4.41-5.13) | 0.93 (0.86-1.00) | 362   | 4.95 (4.45-5.45)  |
| <b>Managers of small enterprises</b>                                      | 7 382  | 1 352 144 | 4.67 (4.55-4.79) | 0.92 (0.90-0.94) | 3 445 | 4.39 (4.25-4.53)  |
| <b>Customs, tax and related government associate professionals</b>        | 1 261  | 288 657   | 4.58 (4.26-4.90) | 0.90 (0.85-0.95) | 794   | 3.88 (3.61-4.14)  |
| <b>Animal producers and related workers</b>                               | 1 445  | 254 436   | 4.53 (4.22-4.84) | 0.84 (0.80-0.88) | 650   | 3.64 (3.37-3.92)  |
| <b>Computer associate professionals</b>                                   | 2 090  | 584 301   | 4.53 (4.27-4.79) | 0.88 (0.85-0.92) | 1 106 | 3.28 (3.09-3.47)  |
| <b>Precision workers in metal and related materials</b>                   | 397    | 71 093    | 4.50 (3.89-5.11) | 0.90 (0.82-1.00) | 236   | 4.75 (4.15-5.34)  |
| <b>Senior officials of special-interest organisations</b>                 | 124    | 20 327    | 4.50 (3.59-5.41) | 0.89 (0.74-1.06) | 64    | 5.46 (4.16-6.76)  |
| <b>Health professionals (except nursing)</b>                              | 2 309  | 510 394   | 4.39 (4.20-4.57) | 0.84 (0.81-0.88) | 1 582 | 3.71 (3.53-3.89)  |
| <b>Pre-primary education teaching associate professionals</b>             | 2 430  | 931 455   | 4.30 (3.90-4.70) | 0.72 (0.69-0.75) | 1 696 | 2.24 (2.13-2.34)  |
| <b>Accountants</b>                                                        | 4 993  | 1 356 161 | 4.29 (4.16-4.43) | 0.80 (0.78-0.82) | 2 436 | 3.23 (3.10-3.35)  |
| <b>Ship and aircraft controllers and technicians</b>                      | 490    | 92 485    | 4.26 (3.01-5.50) | 0.82 (0.75-0.90) | 261   | 3.92 (3.46-4.39)  |
| <b>Handicraft workers in wood, textile, leather and related materials</b> | 56     | 8 460     | 4.25 (2.78-5.72) | 0.89 (0.67-1.16) | 33    | 7.55 (5.07-10.03) |
| <b>Finance and sales associate professionals</b>                          | 10 306 | 2 597 942 | 4.16 (4.08-4.25) | 0.80 (0.79-0.82) | 5 391 | 3.17 (3.09-3.26)  |
| <b>Engineers and technicians</b>                                          | 9 752  | 2 064 837 | 4.12 (4.00-4.25) | 0.80 (0.79-0.82) | 4 422 | 3.88 (3.77-3.99)  |
| <b>Optical and electronic equipment operators</b>                         | 553    | 134 137   | 4.11 (3.70-4.52) | 0.78 (0.72-0.85) | 349   | 3.38 (3.03-3.73)  |
| <b>Psychologists, social work and related professionals</b>               | 1 486  | 428 609   | 4.08 (3.83-4.33) | 0.77 (0.73-0.81) | 920   | 2.90 (2.71-3.08)  |
| <b>Public service administrative professionals</b>                        | 3 643  | 841 592   | 4.08 (3.94-4.21) | 0.79 (0.76-0.82) | 1 657 | 3.23 (3.08-3.38)  |
| <b>Nursing and midwifery professionals</b>                                | 1 545  | 516 842   | 4.02 (3.56-4.49) | 0.69 (0.65-0.72) | 690   | 2.22 (2.06-2.38)  |
| <b>Life science technicians</b>                                           | 440    | 131 035   | 3.96 (3.32-4.60) | 0.76 (0.69-0.83) | 252   | 2.80 (2.46-3.14)  |
| <b>Safety and quality inspectors</b>                                      | 814    | 146 087   | 3.96 (3.58-4.34) | 0.83 (0.78-0.89) | 314   | 4.02 (3.59-4.46)  |
| <b>Other teaching professionals</b>                                       | 1 104  | 297 704   | 3.92 (3.68-4.16) | 0.74 (0.70-0.78) | 660   | 2.94 (2.72-3.16)  |
| <b>Police officers and detectives</b>                                     | 906    | 180 335   | 3.91 (3.46-4.37) | 0.82 (0.77-0.88) | 343   | 2.85 (2.55-3.14)  |
| <b>Elementary school teachers</b>                                         | 3 613  | 1 143 754 | 3.90 (3.76-4.05) | 0.71 (0.68-0.73) | 1 841 | 2.50 (2.39-2.62)  |
| <b>Wood treaters, cabinet-makers and related trades workers</b>           | 192    | 40 389    | 3.86 (3.08-4.65) | 0.77 (0.67-0.89) | 97    | 4.31 (3.47-5.15)  |
| <b>Production and operations managers</b>                                 | 5 019  | 1 164 398 | 3.81 (3.70-3.93) | 0.75 (0.73-0.77) | 2 370 | 2.82 (2.71-2.94)  |
| <b>Directors and chief executives</b>                                     | 2 094  | 395 930   | 3.69 (3.42-3.96) | 0.77 (0.74-0.80) | 978   | 3.67 (3.44-3.89)  |

|                                                                                        |       |           |                  |                  |       |                  |
|----------------------------------------------------------------------------------------|-------|-----------|------------------|------------------|-------|------------------|
| <b>Computer scientists</b>                                                             | 3 256 | 1 171 927 | 3.68 (3.49-3.87) | 0.67 (0.65-0.69) | 1 900 | 2.22 (2.12-2.32) |
| <b>Artistic, entertainment and sports associate professionals</b>                      | 559   | 219 412   | 3.67 (3.33-4.01) | 0.67 (0.61-0.73) | 308   | 2.09 (1.86-2.32) |
| <b>Senior high school teachers</b>                                                     | 3 001 | 809 518   | 3.49 (3.37-3.62) | 0.67 (0.65-0.70) | 1 630 | 3.06 (2.91-3.21) |
| <b>Legal professionals</b>                                                             | 688   | 201 168   | 3.47 (3.20-3.74) | 0.67 (0.62-0.72) | 375   | 2.51 (2.26-2.76) |
| <b>Agronomy and forestry technicians</b>                                               | 275   | 60 351    | 3.45 (2.90-4.00) | 0.72 (0.64-0.81) | 112   | 3.70 (3.02-4.37) |
| <b>Special education teaching professionals</b>                                        | 724   | 212 691   | 3.45 (3.11-3.79) | 0.61 (0.56-0.65) | 220   | 2.72 (2.37-3.08) |
| <b>Business professionals</b>                                                          | 5 064 | 1 627 884 | 3.41 (3.32-3.51) | 0.64 (0.63-0.66) | 2 442 | 2.47 (2.38-2.57) |
| <b>Writers and creative or performing artists</b>                                      | 1 521 | 548 912   | 3.38 (3.21-3.55) | 0.63 (0.60-0.66) | 848   | 2.20 (2.05-2.35) |
| <b>Armed forces</b>                                                                    | 765   | 149 740   | 3.33 (2.30-4.36) | 0.83 (0.77-0.89) | 342   | 3.80 (3.40-4.19) |
| <b>Other specialist managers</b>                                                       | 4 303 | 1 232 885 | 3.28 (3.16-3.40) | 0.63 (0.61-0.65) | 1 636 | 2.29 (2.18-2.40) |
| <b>Archivists, librarians and related information professionals</b>                    | 418   | 132 286   | 3.25 (2.91-3.59) | 0.63 (0.57-0.69) | 207   | 2.36 (2.04-2.68) |
| <b>Health associate professionals (except nursing)</b>                                 | 1 022 | 425 469   | 3.23 (2.97-3.49) | 0.57 (0.54-0.61) | 607   | 1.83 (1.69-1.98) |
| <b>Social science and linguistics professionals (except social work professionals)</b> | 282   | 102 806   | 3.17 (2.79-3.54) | 0.60 (0.53-0.67) | 150   | 2.66 (2.24-3.08) |
| <b>Legislators and senior government officials</b>                                     | 174   | 36 797    | 3.10 (2.55-3.64) | 0.63 (0.54-0.74) | 110   | 3.03 (2.47-3.58) |
| <b>Architects, engineers and related professionals</b>                                 | 3 040 | 1 053 591 | 2.85 (2.69-3.00) | 0.57 (0.55-0.59) | 1 643 | 2.40 (2.29-2.52) |
| <b>Life science professionals</b>                                                      | 165   | 71 450    | 2.84 (2.32-3.36) | 0.50 (0.42-0.58) | 73    | 1.87 (1.44-2.29) |
| <b>College and university teachers</b>                                                 | 1 142 | 468 057   | 2.74 (2.58-2.91) | 0.53 (0.50-0.56) | 583   | 2.11 (1.94-2.28) |
| <b>Physicists, chemists and related professionals</b>                                  | 272   | 120 565   | 2.68 (2.29-3.07) | 0.48 (0.43-0.54) | 103   | 1.70 (1.38-2.03) |
| <b>Mathematicians and statisticians</b>                                                | 58    | 33 490    | 1.70 (1.22-2.18) | 0.35 (0.27-0.45) | 20    | 1.38 (0.78-1.99) |
| <b>Fashion and other models</b>                                                        | 1     | 1 686     | 1.30 (0.00-3.84) | 0.18 (0.00-1.01) | 1     | 1.30 (0.00-3.83) |

**ESM Table 6. Prevalence of overweight and physical fitness ( $W_{max}$ ) in men born 1937-79. Data from the military conscription registry.**

| Occupation                                                   | No.       | % BMI $\geq 25$ | Median $W_{max}$ |
|--------------------------------------------------------------|-----------|-----------------|------------------|
| Manufacturing labourers <sup>1</sup>                         | 25 651    | 14.1%           | 247              |
| Motor-vehicle drivers <sup>1</sup>                           | 81 858    | 16.3%           | 240              |
| Agricultural and other mobile plant operators <sup>1</sup>   | 36 586    | 16.8%           | 247              |
| Personal carers <sup>1b</sup>                                | 58 550    | 12.7%           | 260              |
| Stores and transport clerks                                  | 62 221    | 13.4%           | 256              |
| Machine operators <sup>1</sup>                               | 26 354    | 13.6%           | 256              |
| Metal- and mineral-products machine operators <sup>1</sup>   | 46 141    | 14.4%           | 252              |
| Office clerks                                                | 30 820    | 10.3%           | 258              |
| Retail salespersons <sup>1</sup>                             | 74 024    | 11.7%           | 268              |
| Metal moulders, welders and sheet-metal workers <sup>1</sup> | 36 546    | 13.5%           | 250              |
| Assemblers <sup>1</sup>                                      | 48 203    | 13.6%           | 259              |
| Building finishers and related trades workers <sup>1</sup>   | 89 149    | 11.3%           | 247              |
| Machinery mechanics and fitters <sup>1</sup>                 | 56 977    | 13.6%           | 245              |
| Total working population                                     | 1 312 959 | 10.7%           | 254              |
| Electrical and electronic equipment mechanics <sup>1</sup>   | 38 267    | 10.7%           | 255              |
| Managers of small enterprises                                | 75 910    | 9.0%            | 252              |
| Construction workers <sup>1</sup>                            | 91 565    | 12.2%           | 255              |
| Computer technicians and data operators                      | 46 481    | 10.2%           | 270              |
| Accountants                                                  | 26 856    | 8.1%            | 257              |
| Finance and sales associate professionals                    | 142 073   | 8.5%            | 268              |
| Elementary school teachers                                   | 20 995    | 8.9%            | 273              |
| Engineers and technicians                                    | 139 895   | 9.0%            | 263              |
| Public service administrative professionals                  | 25 918    | 8.2%            | 251              |
| Directors and chief executives                               | 26 689    | 7.3%            | 251              |
| Production and operations managers                           | 63 877    | 8.8%            | 257              |
| Computer scientists                                          | 89 056    | 8.0%            | 278              |
| Senior high school teachers                                  | 26 614    | 8.3%            | 255              |
| Specialist managers                                          | 75 122    | 7.0%            | 264              |
| Business professionals                                       | 67 382    | 6.2%            | 268              |
| Architects and civil engineers                               | 75 170    | 6.8%            | 276              |
| College and university teachers                              | 18 393    | 6.5%            | 276              |

<sup>1</sup> Occupations classified as being in the lowest socio-economic status group. i.e. "skilled and unskilled manual workers" according to Statistics Sweden. <sup>b</sup> Personal carers includes child-care workers, assistant nurses, hospital ward assistants, home-based personal care, attendants in psychiatric care and dental nurses.

**ESM Table 7. Prevalence of overweight and smoking in the first trimester in women born 1937-79. Data from the medical birth registry.**

| Occupation                                         | No.       | % BMI ≥25 | % Smokers |
|----------------------------------------------------|-----------|-----------|-----------|
| Manufacturing labourers <sup>1</sup>               | 13 609    | 29.3%     | 29.8%     |
| Cleaners <sup>1</sup>                              | 49 849    | 29.3%     | 28.6%     |
| Kitchen assistants <sup>1</sup>                    | 42 356    | 29.9%     | 24.0%     |
| Cooks, waitresses and housekeepers <sup>1</sup>    | 31 390    | 28.5%     | 22.8%     |
| Personal carers <sup>1b</sup>                      | 327 744   | 28.1%     | 23.5%     |
| Cashiers, tellers and related clerks <sup>1</sup>  | 18 754    | 28.2%     | 18.2%     |
| Social work associate professionals <sup>1</sup>   | 26 374    | 26.3%     | 19.5%     |
| Office clerks                                      | 84 281    | 22.9%     | 17.3%     |
| Client information clerks                          | 40 262    | 26.7%     | 15.5%     |
| Total working population                           | 1 139 788 | 23.9%     | 16.7%     |
| Retail salespersons <sup>1</sup>                   | 97 774    | 26.4%     | 18.1%     |
| Numerical clerks                                   | 56 896    | 22.0%     | 16.4%     |
| Office secretaries and data entry operators        | 37 142    | 21.2%     | 15.8%     |
| Health professionals (except nursing) <sup>c</sup> | 18 586    | 14.9%     | 3.1%      |
| Managers of small enterprises                      | 31 760    | 21.4%     | 15.7%     |
| Engineers and technicians                          | 27 440    | 22.7%     | 8.5%      |
| Accountants                                        | 72 067    | 20.5%     | 12.8%     |
| Nurses                                             | 54 416    | 21.6%     | 10.8%     |
| Public service administrative professionals        | 35 527    | 20.1%     | 10.8%     |
| Psychologists and social workers                   | 23 950    | 21.3%     | 12.8%     |
| Finance and sales associate professionals          | 77 896    | 21.0%     | 11.1%     |
| Preschool and recreation teachers                  | 67 762    | 23.6%     | 9.0%      |
| Computer scientists                                | 24 850    | 21.3%     | 7.2%      |
| Production and operations managers                 | 37 814    | 20.6%     | 12.7%     |
| Midwives and specialist nurses                     | 31 828    | 18.5%     | 9.7%      |
| Business professionals                             | 68 119    | 18.0%     | 8.1%      |
| Elementary school teachers                         | 63 532    | 22.4%     | 7.8%      |
| Senior high school teachers                        | 30 105    | 21.2%     | 8.6%      |
| Specialist managers                                | 29 997    | 17.5%     | 8.3%      |
| Writers, creative or performing artists            | 23 207    | 17.8%     | 6.5%      |
| Physiotherapists and dental hygienists             | 25 464    | 17.9%     | 5.7%      |

<sup>1</sup> Occupations classified as being in the lowest socio-economic status group. i.e. "skilled and unskilled manual workers" according to Statistics Sweden. <sup>b</sup> Personal carers includes child-care workers, assistant nurses, hospital ward assistants, home-based personal care, attendants in psychiatric care and dental nurses. <sup>c</sup> Health professionals includes physicians, veterinarians, dentists, pharmacists and speech therapists.

ESM Figure 1. Register linkage

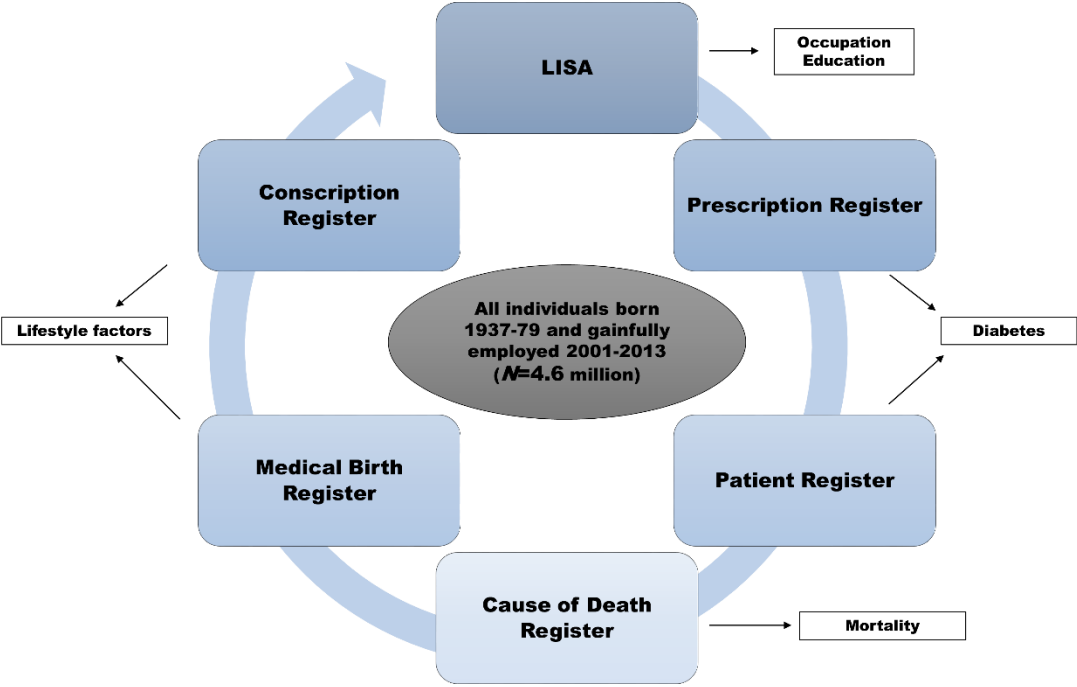

Supplement: MOESM1 [file 17223136]
